# Supplementary material for: Revealing the incorporation of an NH2group into the edge of carbon dots for H2O2sensingviathe C–N⋯H hydrogen bond interaction
Source: Royal Society of Chemistry journal article supplement (doi:10.1039/d2cp04097b), 2022-12-13
Supplement: d2cp04097b1.pdf [file d2cp04097b1.pdf]

## Electronic Supplementary Information

*for*

### Revealing incorporation of NH<sub>2</sub> group into the edge of carbon dots for H<sub>2</sub>O<sub>2</sub> sensing via C–N···H hydrogen bond interaction: A DFT and TDDFT study

Permono Adi Putro <sup>a,b</sup>, Akhiruddin Maddu <sup>a</sup>, Hendradi Hardhienata <sup>a,\*</sup>, Isnaeni Isnaeni <sup>c</sup>, Faozan Ahmad <sup>a,\*</sup>, Hermawan Kresno Dipojono <sup>c,d</sup>

<sup>a</sup> Department of Physics, Faculty of Mathematics and Natural Sciences, IPB University, Bogor 16680, Indonesia

<sup>b</sup> Department of Physics, Faculty of Science, Universitas Mandiri, Subang 41211, Indonesia

<sup>c</sup> Department of Engineering Physics, Faculty of Industrial Technology, Bandung Institute of Technology, Bandung 40132, Indonesia.

<sup>d</sup> Research Center for Nanoscience and Nanotechnology, Bandung Institute of Technology, Bandung 40132, Indonesia.

<sup>e</sup> Research Center for Physics, National Research and Innovation Agency, Banten 15314, Indonesia.

\* Corresponding author:

E-mail addresses: [hendradi@apps.ipb.ac.id](mailto:hendradi@apps.ipb.ac.id) (H. Hardhienata) - <https://orcid.org/0000-0001-9123-4539> ; [faozan@apps.ipb.ac.id](mailto:faozan@apps.ipb.ac.id) (F. Ahmad) - <https://orcid.org/0000-0001-6182-0780>

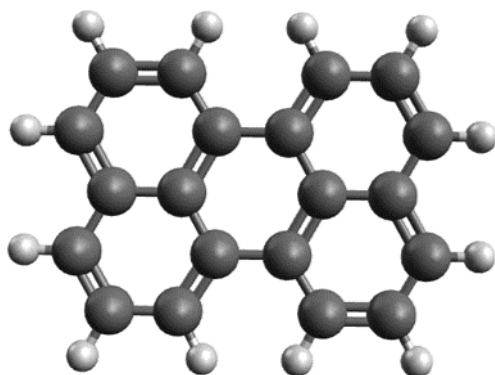

**Fig. S1.** Optimized molecular geometry for carbon dots without  $\text{-NH}_2$  group

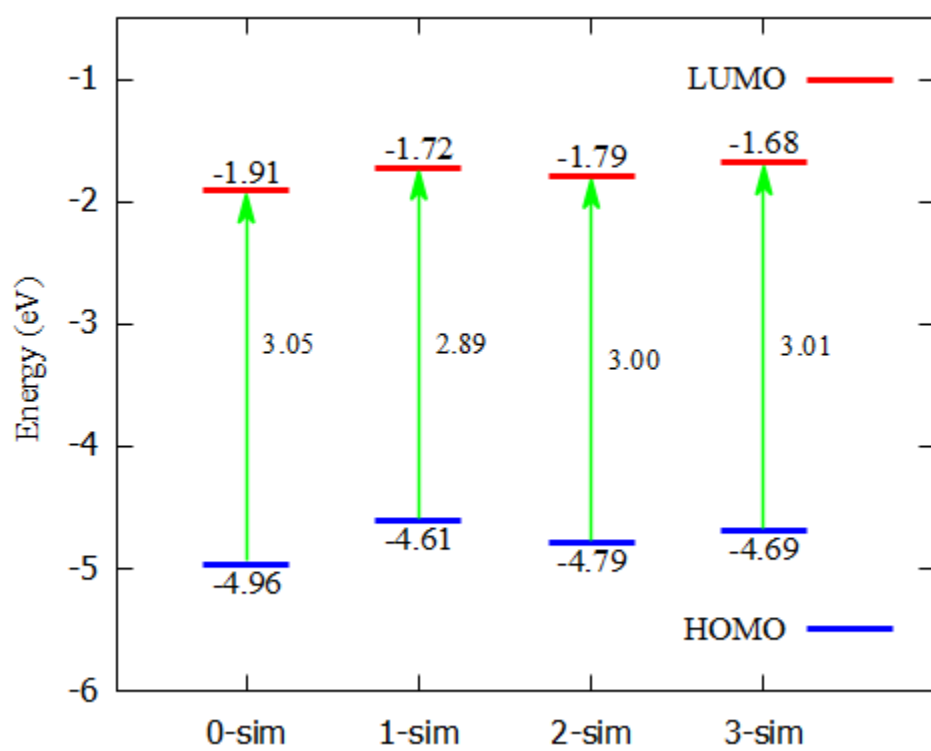

**Fig. S2.** Energy level diagram for carbon dots with and without  $\text{-NH}_2$  group

**Table S1**Mulliken atomic charge distribution for NH<sub>2</sub>-carbon dots before and after interacts with H<sub>2</sub>O<sub>2</sub>.

| Atomic | 1-sim    | 1-com    | Atomic | 2-sim    | 2-com    | Atomic | 3-sim    | 3-com    |
|--------|----------|----------|--------|----------|----------|--------|----------|----------|
| C1     | -0.09015 | -0.09415 | C1     | -0.08792 | -0.08793 | C1     | -0.09603 | -0.09464 |
| C2     | -0.16312 | -0.16174 | C2     | -0.16119 | -0.1615  | C2     | -0.16012 | -0.1592  |
| C3     | -0.15562 | -0.15386 | C3     | -0.16693 | -0.1647  | C3     | -0.15252 | -0.15277 |
| C4     | 0.061046 | 0.061853 | C4     | 0.07477  | 0.072243 | C4     | 0.051095 | 0.052998 |
| C5     | -0.08822 | -0.0881  | C5     | -0.0883  | -0.08828 | C5     | -0.08864 | -0.08832 |
| C6     | -0.13691 | -0.13573 | C6     | -0.13628 | -0.13547 | C6     | -0.13675 | -0.13596 |
| C7     | 0.072485 | 0.072121 | C7     | 0.072713 | 0.073642 | C7     | 0.070366 | 0.070707 |
| C8     | 0.017122 | 0.019707 | C8     | 0.021389 | 0.02246  | C8     | 0.014015 | 0.016197 |
| C9     | 0.094103 | 0.093052 | C9     | 0.091687 | 0.091114 | C9     | 0.094959 | 0.094357 |
| C10    | -0.13958 | -0.13733 | C10    | -0.13532 | -0.13435 | C10    | -0.13825 | -0.13654 |
| C11    | -0.08753 | -0.0879  | C11    | -0.08907 | -0.08976 | C11    | -0.08792 | -0.08838 |
| C12    | -0.14206 | -0.1433  | C12    | -0.14077 | -0.14031 | C12    | -0.13389 | -0.13349 |
| C13    | 0.080652 | 0.088036 | C13    | 0.095709 | 0.092062 | C13    | 0.098049 | 0.101603 |
| C14    | 0.012037 | 0.012377 | C14    | 0.017213 | 0.025041 | C14    | 0.008353 | 0.005325 |
| C15    | 0.074283 | 0.081089 | C15    | 0.07137  | 0.065473 | C15    | 0.058865 | 0.068083 |
| C16    | 0.077001 | 0.074753 | C16    | 0.068842 | 0.066273 | C16    | 0.074032 | 0.074101 |
| C17    | -0.16569 | -0.16361 | C17    | -0.15904 | -0.16153 | C17    | -0.21415 | -0.21073 |
| C18    | 0.226557 | 0.206843 | C18    | -0.18362 | -0.17761 | C18    | -0.14452 | -0.14644 |
| C19    | -0.11686 | -0.11205 | C19    | 0.292126 | 0.267422 | C19    | -0.09855 | -0.1049  |
| C20    | -0.17107 | -0.17447 | C20    | -0.18815 | -0.19628 | C20    | 0.191993 | 0.171314 |
| H1     | 0.082316 | 0.085179 | H1     | 0.084558 | 0.087546 | H1     | 0.082302 | 0.084768 |
| H2     | 0.079114 | 0.081366 | H2     | 0.080997 | 0.099912 | H2     | 0.118116 | 0.108798 |
| H3     | 0.08346  | 0.086602 | H3     | 0.073187 | 0.115675 | N      | -0.66954 | -0.71467 |
| H4     | 0.07152  | 0.077647 | N      | -0.66367 | -0.70747 | H3     | 0.078262 | 0.111966 |
| N      | -0.66478 | -0.70832 | H4     | 0.068376 | 0.069793 | H4     | 0.086345 | 0.090642 |
| H5     | 0.080655 | 0.077755 | H5     | 0.077718 | 0.078519 | H5     | 0.080552 | 0.0835   |
| H6     | 0.084009 | 0.084104 | H6     | 0.082225 | 0.083777 | H6     | 0.08275  | 0.084876 |
| H7     | 0.08391  | 0.085282 | H7     | 0.079904 | 0.081656 | H7     | 0.083497 | 0.084777 |
| H8     | 0.081474 | 0.0834   | H8     | 0.084049 | 0.083857 | H8     | 0.082875 | 0.084655 |
| H9     | 0.083476 | 0.085945 | H9     | 0.085081 | 0.085276 | H9     | 0.083483 | 0.08549  |
| H10    | 0.081464 | 0.08386  | H10    | 0.082428 | 0.083168 | H10    | 0.080635 | 0.08253  |

|     |          |          |     |          |          |     |          |          |
|-----|----------|----------|-----|----------|----------|-----|----------|----------|
| H11 | 0.079655 | 0.082636 | H11 | 0.082922 | 0.083223 | H11 | 0.080314 | 0.082835 |
| H12 | 0.258033 | 0.291861 | H12 | 0.25701  | 0.260496 | H12 | 0.263265 | 0.265838 |
| H13 | 0.257222 | 0.26895  | H13 | 0.255971 | 0.285327 | H13 | 0.256769 | 0.285074 |
| O1  | -        | -0.37118 | O1  | -        | -0.36534 | O1  | -        | -0.36189 |
| O2  | -        | -0.35153 | O2  | -        | -0.35901 | O2  | -        | -0.35499 |
| H14 | -        | 0.359815 | H14 | -        | 0.358668 | H14 | -        | 0.353892 |
| H15 | -        | 0.339028 | H15 | -        | 0.336885 | H15 | -        | 0.338583 |

---

**Table S2**Wavelength ( $\lambda$ ) and oscillator strength ( $f$ ) in UV-Vis absorption characteristics.

| 1-sim          |        | 2-sim          |        | 3-sim          |        | 1-com          |        | 2-com          |        | 3-com          |        |
|----------------|--------|----------------|--------|----------------|--------|----------------|--------|----------------|--------|----------------|--------|
| $\lambda$ (nm) | $f$    |
| 394.71         | 0.4729 | 380.99         | 0.4046 | 386.52         | 0.3795 | 388.81         | 0.5089 | 375.93         | 0.4266 | 378.94         | 0.4007 |
| 309.01         | 0.0050 | 318.61         | 0.0415 | 303.42         | 0.0146 | 306.08         | 0.0031 | 307.79         | 0.0139 | 300.86         | 0.0128 |
| 284.12         | 0.0018 | 289.99         | 0.0108 | 292.16         | 0.0152 | 283.15         | 0.0001 | 287.41         | 0.0155 | 290.27         | 0.0122 |
| 279.59         | 0.0040 | 272.48         | 0.0021 | 276.76         | 0.0023 | 276.92         | 0.0032 | 272.81         | 0.0006 | 274.76         | 0.0005 |
| 266.97         | 0.0283 | 257.14         | 0.0280 | 255.95         | 0.0192 | 261.82         | 0.0089 | 254.25         | 0.0265 | 252.73         | 0.0149 |
| 250.48         | 0.0201 | 249.52         | 0.0024 | 251.36         | 0.0739 | 249.95         | 0.0150 | 249.00         | 0.0014 | 249.54         | 0.0848 |
| 247.38         | 0.0030 | 242.51         | 0.0017 | 249.47         | 0.0121 | 245.88         | 0.0011 | 241.58         | 0.0031 | 248.067        | 0.0059 |
| 237.47         | 0.0058 | 236.24         | 0.0078 | 237.74         | 0.0041 | 238.31         | 0.0025 | 236.17         | 0.0030 | 237.83         | 0.0056 |
| 223.16         | 0.7011 | 220.42         | 0.7304 | 226.13         | 0.6565 | 221.25         | 0.7265 | 219.42         | 0.8130 | 225.35         | 0.7348 |
| 212.15         | 0.000  | 217.78         | 0.0597 | 214.69         | 0.1295 | 210.08         | 0.0006 | 212.67         | 0.0968 | 212.60         | 0.0970 |

**Table S3**Charge transfer length ( $\Delta r$ ) in Angstrom ( $\text{\AA}$ ) calculated by TDDFT.

| Excited states | 1-sim  | 1-com  | 2-sim  | 2-com  | 3-sim  | 3-com  |
|----------------|--------|--------|--------|--------|--------|--------|
| 1              | 0.6621 | 0.4650 | 0.7636 | 0.4074 | 0.4395 | 0.3138 |
| 2              | 0.6769 | 0.7320 | 1.9537 | 1.6397 | 1.0786 | 1.1680 |
| 3              | 1.1203 | 1.1890 | 1.5226 | 1.2697 | 1.2383 | 1.2558 |
| 4              | 0.8669 | 0.8300 | 0.9065 | 0.7367 | 0.7388 | 0.7029 |
| 5              | 0.7885 | 0.7198 | 1.0214 | 0.7860 | 0.6287 | 0.7460 |
| 6              | 0.8206 | 0.6751 | 0.8196 | 0.6548 | 0.8576 | 0.6874 |
| 7              | 0.7183 | 0.6638 | 0.7880 | 0.6822 | 0.7188 | 0.6803 |
| 8              | 0.4099 | 0.4164 | 0.9517 | 0.7812 | 0.4767 | 0.3868 |
| 9              | 1.0876 | 1.1657 | 1.1077 | 0.9936 | 1.1078 | 0.9961 |
| 10             | 0.7102 | 0.8159 | 1.8717 | 1.8569 | 1.5855 | 1.6967 |
